# Supplementary material for: Steroidomics of Pregnant Women at Advanced Age
Source: Front Endocrinol (Lausanne). 2022 Feb 23;13:796909. doi: 10.3389/fendo.2022.796909 (PMC8905515; doi:10.3389/fendo.2022.796909)
Supplement: Supplementary file 3 [file DataSheet_3.xlsx]

## Sheet: Sheet1
G1	G2	age	weeks	ssy	szy	sex	weight	weightgain	height	motherweight	BMI	MXE1	MXE2	MXE3	MXP	MX17-OH-P	MXT	MXA4	MXDHEA	MXDHT	MXCortisol	MXCortisone	MXRatio	MXCort	MX21-Deo	MX11-Deo	MXPreg	MX17OH-Preg	MXDexamethasone	MXDoc	TPE1	TPE2	TPE3	TPP	TP17-OH-P	TPT	TPA4	TPDHEA	TPDHT	TPCortisol	TPCortisone	TPRatio	TPCort	TP21-Deo	TP11-Deo	TPPreg	TP17OH-Preg	TPDexamethasone	TPDoc
0	0	29	38.2	137	84	2	4060	25	160	88	34.375	4.584	21.025	11.447	171.054	6.171	1.113	2.49	2.062	0.16	258.225	65.442	3.94586	6.486	0.098	1.077	2.247	1.28	0.004	0.396	5.619	0.495	24.735	625.014	2.053	0.063	0.197	0.527		1.016	29.585	0.0343417	0.077	0.002	0.433	32.821	0.335		0.653
0	0	34	38.6	104	61	1	2970	15	155	63	26.2227	1.591	9.488	6.782	73.572	3.285	0.188	0.333		0.077	141.241	23.961	5.89462	3.304	0.065	0.974	2.051	0.795	0.019	0.333	1.026	0.576	7.912	112.05	0.621		0.05	0.767		0.046	9.068	0.00507278	0.015		0.089	14.366	0.075		0.113
0	0	24	38.6	113	67	1	3250	10	156	70	28.764	2.533	15.578	6.206	119.729	4.706	1.363	3.287	1.895	0.206	181.696	37.797	4.80715	4.265	0.078	1.033	2.976	1.286	0.007	0.34	4.824	0.635	26.556	489.708	2.694	0.138	0.666	0.761		0.612	38.209	0.0160172	0.093	0.003	0.534	28.494	0.337		0.861
0	0	32	38.6	125	75	2	3210	9	160	63.7	24.8828	4.071	23.909	10.961	149.785	5.925	1.748	2.729	4.999	0.141	164.649	47.244	3.48508	3.264	0.1	0.948	4.18	1.532	0.006	0.381	4.023	2.861	27.704	326.209	3.723	0.15	1.022	0.329		0.149	20.563	0.00724602	0.007	0.003	0.81	10.219	0.524		1.004
0	0	34	38.1	115	81	2	3300	14	161	73	28.1625	2.804	9.939	6.763	72.763	3.24	0.773	0.598	1.509	0.079	199.064	31.016	6.41811	3.624	0.07	1.247	1.749	1.045	0.027	0.325	2.379	1.067	13.699	179.789	0.721		0.119	0.568		0.034	11.688	0.00290897	0.022		0.233	7.918	0.087	4.224	0.352
0	0	32	39.6	130	72	2	3770	15	162	77	29.34	16.695	4.018	98.344	375.452	15.546	0.053	0.463	1.441	0.013	22.771	48.449	0.469999	0.884	0.067	1.955	14.793	2.347	0.035	0.689	8.631	0.356	30.355	367.037	3.414	0.076	0.508	0.449		0.155	24.218	0.0064002	0.04	0.001	1.285	14.287	0.581		1.217
0	0	32	39	116	70	1	2910	15	165	97.4	35.7759	1.462	7.505	5.597	95.63	3.711	0.947	1.63	0.746	0.175	165.956	32.62	5.08755	3.392	0	0.647	1.473	0.588	0.005	0.201	0.699	6.019	24.29	718.894	2.275		0.182	0.365		0.088	18.599	0.00473144		0.001	0.38	17.958	0.337		0.737
0	0	26	39.4	104	76	2	3980	16	155	65	27.0552	6.248	23.408	20.728	126.721	10.357	0.509	0.861	0.856	0.188	153.763	33.408	4.60258	3.507	0.075	3.651	2.368	1.064	0.005	0.662	13.905	1.579	40.97	469.148	5.359	0.069	0.781	0.722		0.161	17.508	0.0091958	0.044	0.004	1.165	24.335	0.53		1.159
0	0	29	38.2	114	74	2	3930	15	163	70	26.3465	4.202	16.091	10.315	88.297	3.346	0.888	1.452	1.931	0.099	214.117	29.805	7.18393	3.993	0.02	1.912	1.286	1.281		0.207	19.202	0.982	54.906	406.908	5.47	0.104	0.864	0.528		0.333	49.711	0.00669872	0.109		1.255	70.742	0.481	13.482	1.595
0	0	31	39.1	102	64	2	3320	16.5	159	64	25.3155	7.571	27.526	13.299	171.899	14.702	3.531	6.99	0.775	0.409	167.643	39.5	4.24413	2.091	0.103	3.812	1.368	1.811		0.735	7.551	0.337	14.963	235.638	1.973		0.363	0.487		0.01	23.592	0.000423872	0.03		0.42	51.403	0.175	0.007	0.461
0	0	30	39	109	64	1	3500	14	158	64	25.6369	8.265	29.763	14.118	198.279	11.976	10.393	15.705	3.442	0.796	260.248	59.152	4.39965	6.174	0.169	2.926	1.689	2.811		0.531	5.558	6.1	19.452	199.849	2.576		0.417	0.42		0.122	16.223	0.00752019	0.053		0.339	49.213	0.262		0.23
0	0	28	39.4	103	70	1	3820	15	166	74	26.8544	3.622	24.972	13.263	125.189	4.443	0.892	1.285	1.752	0	328.67	56.737	5.79287	7.877	0.037	2.291	2.042	1.185		0.298	11.34	0.414	36.084	358.638	1.783	0.006	0.374	0.205		0.247	32.846	0.00751994	0.07		0.574	24.22	0.183		0.617
0	0	31	38.1	113	60	2	3210	18.5	165	78.5	28.8338	2.411	17.143	10.811	197.192	11.962	6.524	11.399	1.128	0.59	142.071	43.676	3.25284	1.801	0.03	2.256	0.637	1.358		0.721	0.478	0.251	1.647	218.045	0.107		0.003	0.742		0.692	0.888	0.779279	0.014		0.03	7.589	0.032	0.358	0.124
0	0	31	38.4	126	86	1	3500	17	160	92	35.9375	1.154	8.547	9.502	80.861	2.709	2.329	2.663	0.869	0.448	177.274	35.019	5.06222	1.502	0.004	0.909	0	0.498		0.155	15.987	0.603	52.821	377.278	5.123	0.021	0.444	0.487		0.105	35.588	0.00295043	0.04		0.901	27.478	0.46		1.034
0	0	30	40.6	115	72	1	3310	16	158	60	24.0346	4.061	17.697	11.847	128.366	3.977	1.588	1.7	2.693	0.205	269.781	45.406	5.94153	2.473	0.04	1.5	0	1.247		0.233	14.47	0.667	27.468	265.204	2.779	0.038	0.549	0.449		0.106	25.989	0.00407865	0.02		0.435	74.429	0.266		0.309
0	0	32	38.4	132	76	2	2270	14	157	65	26.3702	2.063	15.658	6.85	100.492	3.86	1.352	2.057	5.767	0.107	304.522	53.509	5.69104	8.578	0.073	1.042	2.027	4.023		0.205	22.293	1.023	49.941	438.755	8.854	0.011	0.726	0.456		0.903	37.574	0.0240326	0.1		1.259	39.5	0.761		1.124
0	0	33	38.5	122	67	2	3240	15	173	79	26.3958	4.825	21.087	7.99	143.966	3.841	2.509	1.698	2.524	0.166	187.28	47.405	3.95064	2.229	0.009	0.79	1.459	0.678		0.179	16.831	0.617	24.875	460.688	3.379	0.014	0.548	0.363		0.028	18.032	0.0015528	0.019		0.472	59.9	0.295	5.731	0.977
0	0	30	40.1	133	81	1	3920	25	166	85	30.8463	4.869	13.193	8.375	124.743	3.65	3.53	4.04	5.14	0.301	455.469	49.195	9.25844	11.223	0.27	1.607	0.661	2.78		0.191	10.02	0.427	48.932	379.446	1.888	0.065	0.589	0.442		0.568	42.712	0.0132984	0.06		0.702	97.759	0.207		0.606
0	0	28	39	108	52	1	2960	12.5	161	58.5	22.5686	2.504	19.641	12.069	118.121	9.232	1.978	3.827	0.557	0.285	211.635	44.624	4.74263	4.126	0.028	2.456	1.226	1.072		0.612	6.514	6.456	33.619	265.006	4.316	0.034	0.91	0.746	0.001	0.464	31.17	0.0148861	0.094		0.572	75.452	0.461		0.368
0	0	28	38.1	108	70	2	3100	15	163	71.3	26.8358	3.099	13.014	9.269	157.227	4.69	0.515	0.715	1.192	0.194	223.612	36.691	6.09446	4.936	0.016	2.999	1.116	0.862		0.267	1.245	1.364	6.862	189.033	0.654	0.039	0.058	0.773		0.001	5.868	0.000170416		0.002	0.176	13.425	0.047		0.247
1	1	37	38.1	112	78	2	3260	23	155	67	27.8876	1.876	11.5	10.857	97.758	7.513	0.325	0.363	0.6	0.124	94.413	26.851	3.51618	2.413	0.087	3.533	4.41	1.047	0.006	0.336	3.371	0.884	28.352	183.3	2.175	0.114	0.579	0.879		0.175	25.978	0.00673647	0.009	0.003	1.216	31.158	0.389		0.497
1	1	36	38.3	124	72	2	3290	13	162	72	27.4348	2.469	13.39	8.984	115.75	5.449	1.105	1.423	4.211	0.103	178.984	40.43	4.42701	3.593	0.083	0.856	4.85	1.537	0.007	0.245	14.929	1.64	28.792	691.564	3.056	0.038	0.381	0.69		0.163	16.441	0.00991424		0.005	0.626	24.227	0.401		0.902
1	1	36	39.1	101	61	2	3600	11.8	162	67.5	25.7202	4.957	21.677	14.323	186.13	9.396	0.979	1.311	1.421	0.191	282.095	57.159	4.93527	3.893	0.111	2.798	0	1.447	0.063	0.599	9.465	0.925	27.828	303.893	2.842	0.086	0.379	0.624		0.111	12.112	0.00916446	0.016		0.897	11.855	0.316		1.397
1	1	41	39.6	123	74	1	2810	16	158	64	25.6369	5.846	16.986	9.13	103.105	4.983	0.297	0.583	0.857	0.053	293.782	51.717	5.68057	2.238	0.098	0.829	2.34	0.771		0.167	3.189	0.464	47.308	497.211	2.661	0.128	0.546	0.721		0.149	31.317	0.0047578	0.009	0.002	0.889	55.467	0.423		0.676
1	1	35	38.2	110	78	1	3230	15	167	67	24.0238	5.377	28.357	11.642	159.402	7.131	0.716	1.443	2.037	0.152	208.732	58.807	3.54944	3.814	0.054	2.104	8.939	0.952	0.008	0.419	6.164	4.723	21.738	310.588	1.875	0.063	0.229	0.869		0.202	14.695	0.0137462	0.028	0.001	0.424	21.992	0.195		0.411
1	1	36	39	120	74	2	3660	24	158	82	32.8473	2.128	15.076	12.619	101.038	4.281	0.288	0.703	1.504	0.074	198.129	50.374	3.93316	4.215	0.045	1.142	2.783	1.102	0.004	0.23	2.883	2.28	23.424	183.888	0.911		0.126			0.025	15.91	0.00157134	0.024		0.352	13.895	0.106		0.232
1	1	35	37.2	109	67	2	3410	8.5	163	68.5	25.7819	1.959	16.758	12.146	102.113	6.108	0.488	0.756	1.716	0.074	162.843	30.181	5.39555	6.176	0.023	1.39	0	1.542	0.045	0.245	13.726	1.071	55.38	439.152	9.391	0.166	1.652	0.435		0.259	39.675	0.00652804	0.126		2.353	16.057	1.148		1.9
1	1	36	39	97	69	2	3280	17	160	63	24.6094	2.321	10.147	6.554	49.41	4.035	0.389	0.574	1.473	0.1	168.469	38.956	4.3246	2.872	0.015	0.789	2.259	0.741	0.004	0.146	8.364	0.154	52.782	316.983	3.972	0.068	0.481	0.695		0.27	37.284	0.00724171	0.089	0.001	0.994	36.803	0.573		0.518
1	1	39	39.1	92	62	1	3720	14.5	155	62	25.8065	4.842	20.738	19.606	118.419	6.368	0.993	1.266	0.656	0.11	218.187	37.391	5.83528	2.691	0.031	3.555	1.753	1.166		0.502	10.066	0.35	19.728	321.655	2.833	0.002	0.313	0.41		0.167	11.843	0.0141012	0.07		0.399	13.368	0.198		0.624
1	1	35	38.3	120	72	2	2810	7	150	56	24.8889	14.464	31.449	15.565	158.362	9.52	0.682	0.69	1.727		384.294	53.965	7.12117	5.195	0.059	3.19	0.658	1.566		0.428	17.812	0.825	29.128	388.294	3.607		0.333	0.515		0.468	22.057	0.0212178	0.106		0.503	39.257	0.289		0.575
1	1	42	37.5	113	71	1	3450	15	155	60	24.974	0.089		0.031	3.181	0.091	0.31	0.468	0.361		224.535	34.274	6.55118	1.119		0.276	0.993	0.054		0.013	13.901	0.518	28.541	361.894	4.886		0.374	0.47		0.148	25.358	0.00583642	0.066		0.611	51.872	0.393		0.726
1	2	36	38.6	142	96	2	3880	15	160	81.5	31.8359	6.477	28.017	17.873	178.896	6.766	0.972	1.301	2.143	0.12	337.702	61.325	5.50676	5.355		2.209	0.672	2.013		0.345	8.544	0.314	15.676	302.914	1.356		0.344	0.56		0.4	30.402	0.013157	0.08		0.366	37.168	0.13		0.638
1	2	35	38.6	122	71	1	3080		160	63	24.6094	8.141	25.232	13.006	138.692	6.557	1.27	1.928	2.791	0.164	321.906	50.806	6.33598	6.848		2.49	3.03	2.019		0.357	34.358	1.364	67.069	397.41	6.165	0.086	2.309	0.41	0.002	0.9	50.307	0.0178902	0.181		1.604	119.535	0.725		0.81
1	1	39	39.2	120	70	1	3980	18	158	68	27.2392	4.141	22.082	17.367	193.694	6.553	0.675	0.918	1.914		152.955	37.156	4.11656	2.675		2.453	0	0.936		0.647	18.56	0.801	51.504	442.15	4.646	0.008	0.799	0.479		0.275	40.74	0.00675012	0.121		1.112	70.751	0.406	18.73	0.83
1	1	39	39	123	66	1	3460	12.5	170	72.4	25.0519	8.246	12.515	7.238	56.864	3.003	0.881	1.209	1.194		373.699	35.33	10.5774	6.063	0.057	1.201	0.26	0.92		0.12	7.976	0.385	44.103	337.247	2.855	0.01	0.347	0.531		0.191	25.725	0.00742468	0.035		0.738	51.103	0.322	5.656	0.644
1	1	36	38.6	130	78	1	3200	18	161	71	27.3909	2.018	18.03	12.083	155.543	6.982	3.807	4.346	2.546	0.389	274.675	51.696	5.31327	5.156	0.016	1.725	1.738	1.766		0.276	11.312	2.144	37.212	735.925	2.237	0.071	0.448	0.579		0.063	15.47	0.0040724	0.007	0.001	1.053	82.302	0.358		1.255
1	2	35	38.1	111	76	2	3230	10	160	90	35.1562	3.381	13.547	8.088	68.847	6.606	2.667	4.993	3.481	0.193	270.219	50.614	5.33882	1.99		1.07	0	1.142		0.194	22.512	0.991	30.2	376.063	5.795		0.785	0.6		0.117	62.775	0.0018638	0.039		0.551	42.743	0.519		0.676
1	2	35	39.2	120	70	2	3610	15	158	82.5	33.0476	2.982	17.649	14.868	136.259	8.517	2.512	3.491	1.659	0.264	285.751	57.355	4.98215	3.52	0.033	3.033	1.281	1.805		0.353	20.092	0.763	41.636	440.154	7.452		0.568	0.463		0.173	26.655	0.00649034	0.094		1.419	47.802	0.587		1.369
1	2	37	38.3	95	53	1	3500	9	156	58	23.833	2.579	21.694	11.558	181.701	5.895	0.824	1.389	2.629		221.548	47.752	4.63955	4.123		1.867	3.252	1.971		0.283	11.788	0.44	26.289	408.57	2.745	0.007	0.268	0.561		0.232	28.256	0.00821065	0.133		0.364	68.711	0.27		0.554
1	2	40	39.5	112	70	2	4270	17	170	76	26.2976	3.064	11.143	10.626	115.764	5.75	1.824	2.607	1.996	0.178	148.039	28.194	5.25073	0.824	0.016	1.701	0.552	0.84		0.206	4.629	0.751	40.25	607.355	2.745	0.063	0.297	0.613		0.084	22.835	0.00367856		0.002	0.941	20.064	0.428		0.918
0:: control	1: AMA1	MX: maternal blood
1: GDM	2: AMA2	QX: cord blood
		TP: placenta
[truncated: 19 more columns]
